# Supplementary material
Source: Springer Nature journal article supplement (https://www.springermedizin.de/resource/supplementary/12885_2011_2982_MOESM2_ESM.pdf/9462406)
Supplement: MOESM2 [file 9462406]

1364 Patients were asked for participation

Did not meet the inclusion criteria (n=111)  
Did meet the exclusion criteria (n=130)

- $\leq 10$  fractions of RT (n=26)
- Unable to read and speak Dutch (n=12)
- Unable to complete questionnaires (n=92)

1123 Patients were eligible

Refused participation (total n=555, EXP n=287)

- Duration study of 1 year too long (total n= 164, EXP n=94)
- Completing questionnaires takes too much time (total n=38, EXP n=17)
- No interest (total n=25, EXP n=18)
- Consider themselves too old (total n=14, EXP n=8)
- Study not important (total n=30, EXP n=13)
- Participating in study elsewhere (total n=17, EXP n=9)
- Getting social support and experiencing no problems (total n=11, EXP n=6)
- Reason unknown (total n=135, EXP n=75)
- Other reasons (total n=121, EXP n=47)

568 Patients signed informed consent form (50.6%)

300 Patients linked to one of the seven radiotherapists of control group (CON)

268 Patients linked to one of the seven radiotherapists of experimental group (EXP)

In total, 5 of the 268 patients did not complete the SIPP before first consultation

First consultation, before radiotherapy treatment

Directly after consultation: 5 of the 7 radiotherapists completed in total 122 process-evaluation forms after seeing participating patients

Directly after first consultation: 7 of the 268 patients did not complete the process-evaluation form

In total, 18 of the 268 patients did not complete the second SIPP before consultation at the end of radiotherapy treatment

Consultation at the end of radiotherapy treatment
